# Supplementary material for: Evaluation of The Role of Quantitative Electroencephalogram in The Diagnosis of Attention Deficit Hyperactivity Disorder in School Age Children
Source: Research Square preprint supplement (doi:10.21203/rs.3.rs-7701982/v1), 2025-10-09
Supplement: Supplementary file 1 [file 68ff2e112c1a41167a8e3259.docx]

(Table 1 to table 19) : comparison between case and control group as regard relative power of ( delta- theta- alpha- beta1- beta2- beta3 ) in each of the 19 electrodes. Whereas delta= 0.5-4 Hz , theta= 4-8 Hz, alpha=8-13 Hz, beta 1 = 13-20 Hz, beta 2 =20-30 Hz , beta3= 30 Hz or more.

**Table (1): Comparison of F7 findings between control and cases groups**

| F7 | Control group  n=30 | Cases group  n=45 | test of significance |
| --- | --- | --- | --- |
| Delta | 35.34±3.83 | 36.26±9.75 | t=0.492  p=0.624 |
| Theta | 14.60±1.99 | 16.09±4.50 | t=1.69  p=0.094 |
| Alpha | 16.19±2.81 | 14.75±1.97 | t=2.63  p=0.01* |
| Beta 1 | 12.23±1.60 | 11.77±2.59 | t=0.869  p=0.388 |
| Beta 2 | 9.19±1.43 | 8.77±2.76 | t=0.771  p=0.443 |
| Beta 3 | 12.43±2.37 | 12.36±5.41 | t=0.072  p=0.943 |

t:Student t test , *statistically significant

Table (1) illustrates no statistically significant difference between studied groups as regard F7 delta , theta , beta 1 , beta 2 and beta 3. A statistically significant higher mean (F7 alpha) among control than cases group (16.19±2.81and 14.75±1.97 , respectively).

**Table (2):Comparison of T3 findings between control and cases groups**

| T3 | Control group  n=30 | Cases group  n=45 | test of significance |
| --- | --- | --- | --- |
| Delta | 32.70±5.66 | 33.75±9.94 | t=0.521  p=0.604 |
| Theta | 15.22±2.85 | 16.21±4.18 | t=1.13  p=0.264 |
| Alpha | 16.91±2.42 | 15.65±1.92 | t=2.51  p=0.014* |
| Beta 1 | 12.93±1.92 | 12.41±2.77 | t=0.880  p=0.382 |
| Beta 2 | 9.59±1.66 | 9.09±2.80 | t=0.881  p=0.381 |
| Beta 3 | 12.63±2.87 | 12.88±5.38 | t=0.230  p=0.818 |

t:Student t test , *statistically significant

Table (2) demonstrates no statistically significant difference between studied groups as regard T3 delta , theta , beta 1 , beta 2 and beta 3. A statistically significant higher mean (T3 alpha )among control than cases group ( 16.91±2.42 and 15.65±1.92 , respectively)

**Table (3): Comparison of T5 findings between control and cases groups**

| T5 | Control group  n=30 | Cases group  n=45 | test of significance |
| --- | --- | --- | --- |
| Delta | 31.51±5.86 | 33.35±8.84 | t=0.998  p=0.322 |
| Theta | 15.32±2.89 | 16.68±4.74 | t=1.41  p=0.164 |
| Alpha | 19.05±3.98 | 17.02±3.02 | t=2.51  p=0.014* |
| Beta 1 | 12.76±1.97 | 12.07±2.71 | t=1.19  p=0.237 |
| Beta 2 | 9.15±1.94 | 8.56±2.95 | t=0.970  p=0.335 |
| Beta 3 | 12.20±3.23 | 12.31±5.52 | t=0.099  p=0.921 |

t:Student t test , *statistically significant

Table (3) shows no statistically significant difference between studied groups as regard T5 delta , theta , beta 1 , beta 2 and beta 3. A statistically significant higher mean (T5 alpha )among control than cases group ( 19.05±3.98 and 17.02±3.02, respectively)

**Table (4): Comparison of FP1 findings between control and cases groups**

| FP1 | Control group  n=30 | Cases group  n=45 | test of significance |
| --- | --- | --- | --- |
| Delta | 30.56±5.82 | 31.93±9.93 | t=0.682  p=0.498 |
| Theta | 12.96±1.44 | 15.02±4.42 | t=2.47  p=0.016* |
| Alpha | 15.38±1.81 | 14.64±1.50 | t=1.93  p=0.06 |
| Beta 1 | 13.82±1.64 | 12.79±2.55 | t=1.95  p=0.06 |
| Beta 2 | 11.23±1.54 | 10.28±2.82 | t=1.69  p=0.096 |
| Beta 3 | 16.05±2.92 | 15.33±5.56 | t=0.649  p=0.518 |

t:Student t test , *statistically significant

Table (4) illustrates no statistically significant difference between studied groups as regard FP delta , alpha , beta 1 , beta 2 and beta 3. A statistically significant higher mean (FP1 theta )among cases than control group ( 15.02±4.42 and 12.96±1.44, respectively)

**Table (5):Comparison of F3 findings between control and cases groups**

| F3 | Control group  n=30 | Cases group  n=45 | test of significance |
| --- | --- | --- | --- |
| Delta | 29.92±5.98 | 32.99±9.98 | t=1.51  p=0.135 |
| Theta | 13.88±1.78 | 15.57±4.39 | t=1.99  p=0.05* |
| Alpha | 16.64±2.45 | 15.08±1.64 | t=3.31  p=0.001* |
| Beta 1 | 13.85±2.06 | 12.61±2.61 | t=2.18  p=0.03* |
| Beta 2 | 10.82±1.97 | 9.68±3.10 | t=1.79  p=0.08 |
| Beta 3 | 14.84±3.39 | 14.06±5.93 | t=0.652  p=0.517 |

t:Student t test , *statistically significant

Table (5) shows no statistically significant difference between studied groups as regard F3 delta , beta 2 and beta 3. A statistically significant higher mean (F3 theta ) among cases than control group ( 15.57±4.39 and 13.88±1.78, respectively). A statistically significant higher mean (F3 alpha, beta1 )among control than cases group ( 16.64±2.45 & 15.08±1.64 , respectively) and (13.85±2.06 & 12.61±2.61, respectively) for F3alpha and F3beta 1 ,respectively.

**Table (6): Comparison of C3 findings between control and cases groups**

| C3 | Control group  n=30 | Cases group  n=45 | test of significance |
| --- | --- | --- | --- |
| Delta | 34.06±5.30 | 35.24±8.74 | t=0.659  p=0.512 |
| Theta | 15.29±2.51 | 16.71±4.42 | t=1.59  p=0.115 |
| Alpha | 18.09±3.71 | 16.35±2.15 | t=2.57  p=0.012* |
| Beta 1 | 12.03±1.80 | 11.53±2.25 | t=1.02  p=0.312 |
| Beta 2 | 8.68±1.64 | 8.37±2.86 | t=0.541  p=0.590 |
| Beta 3 | 11.67±2.28 | 11.75±5.48 | t=0.075  p=0.940 |

t:Student t test , *statistically significant

Table (6) illustrates no statistically significant difference between studied groups as regard C3 delta , theta , beta 1 , beta 2 and beta 3. A statistically significant higher mean (C3 alpha ) is detected among control than cases group ( 18.09±3.71 and 16.35±2.15, respectively).

**Table (7): Comparison of P3 findings between control and cases groups**

| P3 | Control group  n=30 | Cases group  n=45 | test of significance |
| --- | --- | --- | --- |
| Delta | 34.33±5.52 | 34.77±8.78 | t=0.244  p=0.808 |
| Theta | 15.68±2.48 | 16.98±4.56 | t=1.42  p=0.161 |
| Alpha | 19.01±4.06 | 17.08±2.82 | t=2.42  p=0.018* |
| Beta 1 | 11.93±1.89 | 11.76±2.65 | t=0.303  p=0.763 |
| Beta 2 | 8.19±1.52 | 8.11±2.71 | t=0.142  p=0.888 |
| Beta 3 | 10.89±2.25 | 11.30±5.06 | t=0.410  p=0.683 |

t:Student t test , *statistically significant

Table (7) shows no statistically significant difference between studied groups as regard P3 delta , theta , beta 1 , beta 2 and beta 3. A statistically significant higher mean (P3 alpha ) is detected among control than cases group ( 19.01±4.06 and 17.08±2.82, respectively).

**Table (8): Comparison of O1 findings between control and cases groups**

| O1 | Control group  n=30 | Cases group  n=45 | test of significance |
| --- | --- | --- | --- |
| Delta | 30.19±7.06 | 34.61±10.21 | t=2.06  p=0.04* |
| Theta | 15.22±3.41 | 17.09±5.36 | t=1.69  p=0.094 |
| Alpha | 20.55±5.44 | 17.62±3.68 | t=2.78  p=0.007* |
| Beta 1 | 12.67±2.42 | 11.46±2.89 | t=1.88  p=0.064 |
| Beta 2 | 9.11±2.59 | 7.96±3.25 | t=1.61  p=0.112 |
| Beta 3 | 12.25±4.59 | 11.16±6.41 | t=0.807  p=0.422 |

t:Student t test , *statistically significant

Table (8) shows no statistically significant difference between studied groups as regard O1 theta , beta 1 , beta 2 and beta 3. A statistically significant higher mean (O1 delta) is detected among cases than control group ( 34.61±10.21 and 30.19±7.06 , respectively). Higher mean O1 alpha is detected among control than cases group (20.55±5.44 versus 17.62±3.68, respectively).

**Table (9): Comparison of F8 findings between control and cases groups**

| F8 | Control group  n=30 | Cases group  n=45 | test of significance |
| --- | --- | --- | --- |
| Delta | 34.81±3.72 | 35.91±8.76 | t=0.649  p=0.519 |
| Theta | 14.63±1.96 | 15.96±4.26 | t=1.60  p=0.113 |
| Alpha | 16.21±2.75 | 14.96±1.66 | t=2.45  p=0.016* |
| Beta 1 | 12.36±1.49 | 11.73±2.24 | t=1.35  p=0.180 |
| Beta 2 | 9.36±1.47 | 8.84±2.75 | t=0.950  p=0.345 |
| Beta 3 | 12.56±2.40 | 12.59±5.33 | t=0.035  p=0.972 |

t:Student t test , *statistically significant

Table (9) demonstrates no statistically significant difference between studied groups as regard F8 delta ,theta , beta1 , beta 2 and beta 3. A statistically significant higher mean (F8 alpha) is detected among control than cases group ( 16.21±2.75 and 14.96±1.66 , respectively).

**Table (10): Comparison of T4 findings between control and cases groups**

| T4 | Control group  n=30 | Cases group  n=45 | test of significance |
| --- | --- | --- | --- |
| Delta | 32.47±4.77 | 33.96±9.05 | t=0.827  p=0.411 |
| Theta | 15.16±2.21 | 16.25±3.94 | t=1.37  p=0.175 |
| Alpha | 17.34±2.89 | 16.03±2.23 | t=2.21  p=0.03* |
| Beta 1 | 12.86±1.66 | 12.39±2.67 | t=0.860  p=0.393 |
| Beta 2 | 9.48±1.49 | 8.98±2.82 | t=0.890  p=0.377 |
| Beta 3 | 12.69±2.44 | 12.27±4.97 | t=0.436  p=0.664 |

t:Student t test , *statistically significant

Table (10) shows no statistically significant difference between studied groups as regard T4 delta ,theta, beta 1 , beta 2 and beta 3. A statistically significant higher mean (T4 alpha) is detected among control than cases group ( 17.34±2.89 and 16.03±2.23, respectively).

**Table (11): Comparison of T6 findings between control and cases groups**

| T6 | Control group  n=30 | Cases group  n=45 | test of significance |
| --- | --- | --- | --- |
| Delta | 32.71±4.95 | 34.05±9.02 | t=0.740  p=0.462 |
| Theta | 15.71±2.52 | 16.82±4.75 | t=1.18  p=0.243 |
| Alpha | 19.21±3.94 | 17.41±3.04 | t=2.24  p=0.028* |
| Beta 1 | 12.32±1.66 | 11.76±2.57 | t=1.06  p=0.295 |
| Beta 2 | 8.67±1.52 | 8.41±2.89 | t=0.449  p=0.655 |
| Beta 3 | 11.38±2.35 | 11.55±5.41 | t=0.163  p=0.871 |

t:Student t test , *statistically significant

Table (11) illustrates no statistically significant difference between studied groups as regard T6 delta ,theta , beta 1 , beta 2 and beta 3. A statistically significant higher mean (T6 alpha ) is detected among control than cases group ( 19.21±3.94 and 17.41±3.04, respectively).

**Table (12): Comparison of FP2 findings between control and cases groups**

| FP2 | Control group  n=30 | Cases group  n=45 | test of significance |
| --- | --- | --- | --- |
| Delta | 32.48±5.65 | 33.23±9.53 | t=0.385  p=0.701 |
| Theta | 13.61±1.70 | 15.32±4.69 | t=1.91  p=0.06 |
| Alpha | 15.442±2.03 | 14.39±1.51 | t=2.51  p=0.014* |
| Beta 1 | 13.13±1.66 | 12.57±2.45 | t=1.08  p=0.282 |
| Beta 2 | 10.35±1.61 | 9.88±2.93 | t=0.794  p=0.430 |
| Beta 3 | 14.94±3.07 | 14.59±5.82 | t=0.298  p=0.766 |

t:Student t test , *statistically significant

Table (12) shows no statistically significant difference between studied groups as regard FP2 delta ,theta , beta 1 , beta 2 and beta 3. A statistically significant higher mean (FP2 alpha ) is detected among control than cases group ( 15.442±2.03 and 14.39±1.51, respectively).

**Table (13): Comparison of F4 findings between control and cases groups**

| F4 | Control group  n=30 | Cases group  n=45 | test of significance |
| --- | --- | --- | --- |
| Delta | 30.21±5.77 | 33.16±9.51 | t=1.52  p=0.133 |
| Theta | 14.19±1.96 | 15.57±4.21 | t=1.67  p=0.098 |
| Alpha | 16.83±2.52 | 15.20±1.73 | t=3.31  p=0.001* |
| Beta 1 | 13.43±2.20 | 12.59±2.44 | t=1.53  p=0.129 |
| Beta 2 | 10.55±1.88 | 9.54±3.06 | t=1.61  p=0.112 |
| Beta 3 | 14.77±3.11 | 13.92±6.11 | t=0.698  p=0.487 |

t:Student t test , *statistically significant

Table (13) illustrates no statistically significant difference between studied groups as regard F4 delta ,theta , beta 1 , beta 2 and beta 3. A statistically significant higher mean (F4 alpha) is detected among control than cases group ( 16.83±2.52 and 15.20±1.73, respectively).

**Table (14): Comparison of C4 findings between control and cases groups**

| C4 | Control group  n=30 | Cases group  n=45 | test of significance |
| --- | --- | --- | --- |
| Delta | 31.89±5.46 | 34.26±9.22 | t=1.26  p=0.212 |
| Theta | 15.42±2.61 | 16.57±4.14 | t=1.36  p=0.179 |
| Alpha | 18.31±3.69 | 16.72±2.46 | t=2.25  p=0.028* |
| Beta 1 | 12.68±1.72 | 11.86±2.56 | t=1.56  p=0.124 |
| Beta 2 | 9.21±1.57 | 8.57±2.83 | t=1.12  p=0.265 |
| Beta 3 | 12.54±2.59 | 12.02±5.61 | t=0.473  p=0.638 |

t:Student t test , *statistically significant

Table (14) shows no statistically significant difference between studied groups as regard C4 delta ,theta, beta 1 , beta 2 and beta 3. A statistically significant higher mean (C4 alpha) is detected among control than cases group ( 18.31±3.69 and 16.72±2.46, respectively).

Table (15): Comparison of P4 findings between control and cases groups

| P4 | Control group  n=30 | Cases group  n=45 | test of significance |
| --- | --- | --- | --- |
| Delta | 33.20±6.06 | 35.28±10.22 | t=1.0  p=0.319 |
| Theta | 15.73±2.75 | 17.16±4.76 | t=1.48  p=0.141 |
| Alpha | 19.09±4.31 | 17.59±3.19 | t=1.72  p=0.089 |
| Beta 1 | 12.24±1.81 | 11.31±2.78 | t=1.62  p=0.110 |
| Beta 2 | 8.48±1.58 | 7.82±3.02 | t=1.13  p=0.264 |
| Beta 3 | 11.25±2.88 | 10.84±6.07 | t=0.345  p=0.731 |

t:Student t test

Table (15) demonstrates no statistically significant difference between studied groups as regard P4 delta ,theta, alpha ,beta1 , beta 2 and beta 3 (p>0.05)

**Table (16): Comparison of O2 findings between control and cases groups.**

| O2 | Control group  n=30 | Cases group  n=45 | test of significance |
| --- | --- | --- | --- |
| Delta | 32.14±5.42 | 34.53±10.06 | t=1.18  p=0.238 |
| Theta | 15.68±2.70 | 17.25±5.59 | t=1.42  p=0.160 |
| Alpha | 20.63±5.03 | 17.76±3.71 | t=2.84  p=0.006* |
| Beta 1 | 12.24±1.81 | 11.42±2.88 | t=1.38  p=0.169 |
| Beta 2 | 8.37±1.42 | 7.86±3.15 | t=0.820  p=0.415 |
| Beta 3 | 10.94±2.39 | 11.18±6.37 | t=0.200  p=0.842 |

t:Student t test , *statistically significant

Table (16) shows no statistically significant difference between studied groups as regard O2 delta , theta, beta 1 , beta 2 and beta 3. A statistically significant higher mean (O2 alpha) is detected among control than cases group ( 20.63±5.03 and 17.76±3.71, respectively).

**Table (17): Comparison of FZ findings between control and cases groups**

| FZ | Control group  n=30 | Cases group  n=45 | test of significance |
| --- | --- | --- | --- |
| Delta | 29.86±6.98 | 31.19±10.55 | t=0.610  p=0.543 |
| Theta | 13.81±2.38 | 15.32±4.32 | t=1.74  p=0.086 |
| Alpha | 15.76±2.21 | 14.96±1.67 | t=1.78  p=0.078 |
| Beta 1 | 13.73±2.32 | 13.04±2.67 | t=1.16  p=0.252 |
| Beta 2 | 10.98±2.15 | 10.36±3.13 | t=0.953  p=0.344 |
| Beta 3 | 15.85±3.68 | 15.12±6.27 | t=0.578  p=0.565 |

t:Student t test , *statistically significant

Table (17) demonstrates no statistically significant difference between studied groups as regard FZ delta ,theta, alpha, beta 1 , beta 2 and beta 3 (p>0.05)

**Table (18): Comparison of CZ findings between control and cases groups**

| CZ | Control group  n=30 | Cases group  n=45 | test of significance |
| --- | --- | --- | --- |
| Delta | 31.08±6.16 | 33.18±10.16 | t=12.62  p=0.316 |
| Theta | 14.79±2.54 | 16.36±4.35 | t=1.78  p=0.08 |
| Alpha | 17.09±2.89 | 15.72±2.09 | t=2.38  p=0.02* |
| Beta 1 | 13.21±2.03 | 12.12±2.67 | t=1.90  p=0.061 |
| Beta 2 | 9.967±2.09 | 9.3±3.06 | t=1.04  p=0.302 |
| Beta 3 | 13.85±3.71 | 13.32±5.62 | t=0.455  p=0.650 |

t:Student t test , *statistically significant

Table (18) shows no statistically significant difference between studied groups as regard CZ delta , theta, beta 1 , beta 2 and beta 3. A statistically significant higher mean (CZ alpha) is detected among control than cases group ( 17.09±2.89 and 15.72±2.09, respectively).

**Table (19):Comparison of PZ findings between control and cases groups**

| PZ | Control group  n=30 | Cases group  n=45 | test of significance |
| --- | --- | --- | --- |
| Delta | 33.70±6.32 | 34.98±9.44 | t=0.653  p=0.516 |
| Theta | 15.98±2.58 | 17.26±4.78 | t=1.33  p=0.186 |
| Alpha | 18.95±4.26 | 17.40±3.12 | t=1.82  p=0.073 |
| Beta 1 | 12.10±2.11 | 11.47±2.60 | t=1.11  p=0.272 |
| Beta 2 | 8.23±1.88 | 7.98±3.01 | t=0.397  p=0.692 |
| Beta 3 | 11.03±2.97 | 10.89±5.58 | t=0.118  p=0.906 |

t:Student t test , *statistically significant

Table (19) shows no statistically significant difference between studied groups as regard PZ delta , theta, alpha, beta 1, beta 2 and beta 3 (p>0.05)
